# Supplementary material for: Dominance rank, female reproductive synchrony, and male reproductive skew in wild Assamese macaques
Source: Springer Nature journal article supplement (doi:10.1007/s00265-014-1721-z), 2014-04-02
Supplement: MOESM1 [file 265_2014_1721_MOESM1_ESM.doc]

**Table 1** Characteristic of 15 microsatellite markers in 88 individuals of Assamese macaque

| Locus | n | *NA* | *HO* | *HE* | *FIS* | *FNull* | *PIC* | *PEX1* | *PEX2* | *PEXP* | *PHW* |
| --- | --- | --- | --- | --- | --- | --- | --- | --- | --- | --- | --- |
|
| D8s1106 | 88 | 5 | 0.443 | 0.592 | 0.253 | 0.1288 | 0.513 | 0.818 | 0.685 | 0.534 | 0.00015 |
| D9s910 | 88 | 7 | 0.682 | 0.696 | 0.020 | 0.0093 | 0.633 | 0.734 | 0.571 | 0.399 | 0.93578 |
| D2s1326 | 65 | 12 | 0.769 | 0.870 | 0.197 | 0.0576 | 0.849 | 0.431 | 0.272 | 0.110 | 0.01651 |
| D5s1457 | 88 | 5 | 0.580 | 0.704 | 0.178 | 0.0926 | 0.649 | 0.717 | 0.548 | 0.368 | 0.11309 |
| D18s536 | 85 | 9 | 0.835 | 0.798 | -0.047 | -0.0279 | 0.763 | 0.583 | 0.405 | 0.223 | 0.21808 |
| D1s1656 | 88 | 6 | 0.807 | 0.795 | -0.015 | -0.0109 | 0.758 | 0.592 | 0.413 | 0.223 | 0.92811 |
| D14s306 | 81 | 5 | 0.642 | 0.658 | 0.025 | 0.0132 | 0.587 | 0.771 | 0.619 | 0.454 | 0.79702 |
| D3s1766 | 87 | 7 | 0.724 | 0.738 | -0.093 | 0.0078 | 0.695 | 0.667 | 0.488 | 0.298 | 0.03903 |
| D8s1056 | 87 | 5 | 0.713 | 0.662 | -0.076 | -0.0519 | 0.616 | 0.748 | 0.573 | 0.384 | 0.67320 |
| D10s676 | 87 | 11 | 0.828 | 0.894 | 0.075 | 0.0352 | 0.879 | 0.371 | 0.226 | 0.081 | 0.00948 |
| D1s1675 | 88 | 2 | 0.443 | 0.469 | 0.054 | 0.0249 | 0.357 | 0.891 | 0.821 | 0.730 | 0.65159 |
| D2s1363 | 72 | 13 | 0.681 | 0.847 | 0.197 | 0.1007 | 0.826 | 0.470 | 0.304 | 0.128 | 0.00001 |
| D3s1768 | 87 | 9 | 0.851 | 0.779 | 0.018 | -0.0513 | 0.742 | 0.607 | 0.429 | 0.241 | 0.15600 |
| D17s804 | 88 | 6 | 0.534 | 0.621 | 0.141 | 0.0678 | 0.546 | 0.797 | 0.654 | 0.493 | 0.00327 |
| D9s934 | 87 | 4 | 0.655 | 0.638 | -0.027 | -0.0257 | 0.574 | 0.784 | 0.627 | 0.459 | 0.20723 |

n = number of individuals, *NA* = number of alleles, *HO*= observed heterozygous, *HE* = expected heterozygous, *FIS* = inbreeding coefficient, *FNull* = frequency of null allele, *PIC* = polymorphic information content, *PEX1* = exclusion probability of the locus for the first parent, *PEX2* = exclusion probability of the locus for the second parent with the first assigned, *PEXP* = exclusion probability of the locus for the parent pair, *PHW*= probability for deviation from Hardy-Weinberg equilibrium.
